# Supplementary material
Source: publisher site journal article supplement (https://www.dovepress.com/article/503601)
Supplement: Supplementary file 1 [file get_supplementary_file.php]

## Supplementary Materials

**Table S1.** Operational Definition of Variables<sup>31</sup>

| No                | Variables                                  | Operational definition                                                                                                                                                                                                                                                                                                                                                           |
|-------------------|--------------------------------------------|----------------------------------------------------------------------------------------------------------------------------------------------------------------------------------------------------------------------------------------------------------------------------------------------------------------------------------------------------------------------------------|
| <i>Predictors</i> |                                            |                                                                                                                                                                                                                                                                                                                                                                                  |
| 1                 | Sex                                        | Biological characteristic of respondents. This variable was classified into male and female.                                                                                                                                                                                                                                                                                     |
| 2                 | Age                                        | Age of respondents during the IFLS-5 study. In this study, this variable was classified into < 15 years, 15 to 65 years, and > 65 years.                                                                                                                                                                                                                                         |
| 3                 | Education                                  | Respondents' completion of any formal education based on Indonesian education system. In this study, this variable was classified into schooled and unschooled.                                                                                                                                                                                                                  |
| 4                 | Ethnicity                                  | Respondents' self-identified ethnicity identity. In this study, this variable was classified into Javanese and non-Javanese.                                                                                                                                                                                                                                                     |
| 5                 | Demographical residence                    | Demographical condition of respondents' residence during the IFLS-5 study. This variable was classified into rural and urban residence.                                                                                                                                                                                                                                          |
| 6                 | Geographical residence                     | Geographical location of respondents' residence during the IFLS-5 study. This variable was measured by the respondents' provincial location of residence and was classified in this study into Java and non-Java residence.                                                                                                                                                      |
| 7                 | Household size                             | Total number of household members in respondents' residence. In this study, this variable was classified into 1 person (i.e., living alone), 2 to 6 people, and > 6 people.                                                                                                                                                                                                      |
| 8                 | Annual income                              | Total annual earnings of each respondents in millions of Indonesian Rupiah (IDR). In this study, this variable was classified into 0 or not working, < 40, 40 to 100; and > 40.                                                                                                                                                                                                  |
| 9                 | Health insurance ownership                 | Respondents' participation or ownership of public and/or private insurance program/policy.                                                                                                                                                                                                                                                                                       |
| 10                | Perceived current health condition         | Respondents' observation of their health during the IFLS-5 study. This variable was measured with the question " <i>In general, how is your health?</i> ", with responses classified in this study as unhealthy and healthy.                                                                                                                                                     |
| 11                | Days missed at primary activity last month | The number of days in the last month of the IFLS-5 study in which respondents missed their primary daily activities due to poor health. This variable was measured with the question " <i>During the last 4 weeks, how many days of your primary daily activities did you miss due to poor health?</i> ", with responses classified in this study into 0 to 7 days and > 7 days. |
| 12                | Health expectation next year               | Respondents' self-assessment of expected health condition in the next year. This variable was measured with the question " <i>In general, how would you expect your health in the next year compared to now?</i> ", with responses classified in this study into being worse and about the same/better than the current year.                                                    |

|                |                        |                                                                                                                                                                                                                                                                                                                                                                                                                                                                                                                                                                                                                                                                               |
|----------------|------------------------|-------------------------------------------------------------------------------------------------------------------------------------------------------------------------------------------------------------------------------------------------------------------------------------------------------------------------------------------------------------------------------------------------------------------------------------------------------------------------------------------------------------------------------------------------------------------------------------------------------------------------------------------------------------------------------|
| 13             | Smoking behavior       | Tobacco consumption behavior of respondents since and during the IFLS-5 study. This variable was measured with two questions: “ <i>Have you ever chewed tobacco, smoked a pipe, smoked self-rolled cigarettes, or smoked cigarettes/cigars?</i> ” and “ <i>Do you still have the habit or have you totally quit?</i> ”, with responses classified in this study into non-smoker, ex-smoker, and active smoker.                                                                                                                                                                                                                                                                |
| 14             | Depressive symptoms    | Respondents’ symptoms of depression aside from any formal clinical diagnosis. This variable was measured using the Center of Epidemiologic Studies Depression (CES-D) Scale questionnaire. This variable was classified into having depressive symptoms and not having depressive symptoms.                                                                                                                                                                                                                                                                                                                                                                                   |
| 15             | Multimorbidity         | Number of patients’ chronic diseases. In this study, this variable was classified into having multimorbidity and not having multimorbidity.                                                                                                                                                                                                                                                                                                                                                                                                                                                                                                                                   |
| 16             | Chronic diseases       | Respondents’ reports of formal chronic diseases diagnosis. These chronic diseases were classified by the IFLS-5 study to include arthritis, diabetes, digestive diseases, kidney diseases, dyslipidemia (by total or LDL cholesterol), memory-related diseases, prostate diseases, psychiatric diseases, asthma, hypertension, cancer (as a separate classification from other organ-related diseases), liver diseases, other lung diseases, stroke, tuberculosis, and cardiovascular diseases. This variable was measured with the question “ <i>Has a doctor/paramedic/nurse/midwife ever told you that you had [types of chronic disease]?</i> ” for each chronic disease. |
| <i>Outcome</i> |                        |                                                                                                                                                                                                                                                                                                                                                                                                                                                                                                                                                                                                                                                                               |
| 17             | Treatment nonadherence | Respondents’ report of treatment their chronic disease. This variable was measured with a question “ <i>Are you taking [types of treatment] to treat [types of chronic disease] and its complications?</i> ”. Respondents reporting no treatment for any of the chronic diseases were classified in this study as nonadherent.                                                                                                                                                                                                                                                                                                                                                |
